# Supplementary material
Source: PubMed Central journal article supplement (PMC1397898)
Supplement: pbio.0040073.sg004.pdf [file pbio.0040073.sg004.pdf]

Figure S4

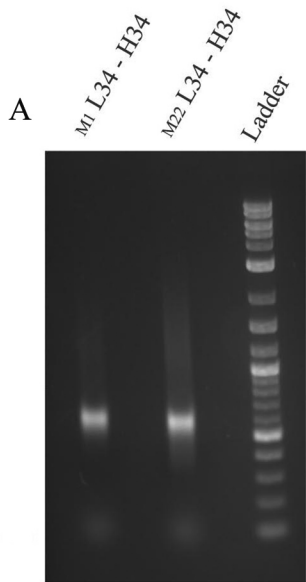

HVR PCR L34 - H34

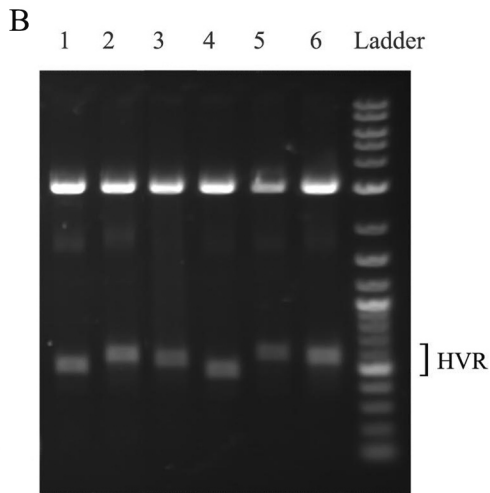

HVR Clones L34 - H34

Figure S4 C, page 1

```

*           *           *           *           50
MAM22_34_3 : ATTTTTTAAACCTAAATTCCCAGCGTACACGCATACGCACATGCATACGT
MAM22_34_4 : ATTTTTTAAACCTAAATTCCCAGCGTACACGCATACGCACATGCATACGT
MAM22_34_7 : ATTTTTTAAACCTAAATTCCCAGCGTACACGCATACGCACATGCATACGT
MAM22_34_8 : ATTTTTTAAACCTAAATTCCCAGCGTACACGCATACGCACATGCATACGT
MAM22_34_9 : ATTTTTTAAAC-TAAATTCCCAGCGTACACGCATACGCACATGCATACGT

*           *           *           *           100
MAM22_34_3 : AC-----ACGTACACGTACGTACACGTACGTACACGTACGTACAC
MAM22_34_4 : AC-----ACGTACACGTACGTACACGTACGTACACGTACGTACAC
MAM22_34_7 : ACACGTACATGTACGTACACGTACGTACACGTACGTACACGTACGTACAC
MAM22_34_8 : AC-----ACGTACACGTACGTACACGTACGTACACGTACGTACAC
MAM22_34_9 : AC-----ACGTACACGTACGTACACGTACGTACACGTACGTACAC

*           *           *           *           150
MAM22_34_3 : GCACGTACACGTACACGTACACGCACGTACACGTACACGTACACGTACGT
MAM22_34_4 : GCATGTACACGTACACGTACACGCACGTACACGTACACGTATACGTACGT
MAM22_34_7 : GCACGTACACGTACACGTACACGCACGTACACGTACACGTACACGTACGT
MAM22_34_8 : GCACGTACACGTACACGTACACGCA-----
MAM22_34_9 : GCACGTACACGTACACGTAC-----

*           *           *           *           200
MAM22_34_3 : ACACGCACGTACACGTACACGTACACGCATACGCATACGCATACGCATAC
MAM22_34_4 : ACACGCACGTACACGTACACGTACACGCATACGCATACGCATACGCATAC
MAM22_34_7 : ACACGCACGTACACGTACACGTAC-----
MAM22_34_8 : -----TACGCATAC
MAM22_34_9 : -----

*           *           *           *           250
MAM22_34_3 : GCATACGCATACGCATACGCATACGCATACGCATACGCATACGCATACGC
MAM22_34_4 : GCATACGCATACGCATACGCATACGCATACGCATACGCATACGCATACGC
MAM22_34_7 : -----ACGC
MAM22_34_8 : GCATACGCATACGCATACGCATACGCATACGCATACGCATACGCATACGC
MAM22_34_9 : ----ACGCATACGCATACGCATACGCATACGCATACGCATACGCATACGC

*           *           *           *           300
MAM22_34_3 : ATACGCATACGCATACGCATACGCATACGCATACGCATACGCATACGCAT
MAM22_34_4 : ATACGCATACGCATACGCATACGCATACGCATACGCATACGCATACGCAT
MAM22_34_7 : ATACGCATACGCATACGCATACGCATACGCATACGCATACGCATACGCAT
MAM22_34_8 : ATACGCATACGCATACGCATACGCATACGCATACGCATACGCATACGCAT
MAM22_34_9 : ATACGCATACGCATACGCATACGCATACGCATACGCATACGCATACGCAT

*           *           *           *           350
MAM22_34_3 : ACGCATACGTATACGTATACG-----
MAM22_34_4 : ACGCATACGCATACGCATACGCATACGCATACGCATACGCATACGCATAC
MAM22_34_7 : ACGCATACGCATACGCATACGCATACGCATACGCATACGCATACGCATAC
MAM22_34_8 : ACGTATACGCATACGCATACGCATACGCATACGCATACGCATACGCATAC
MAM22_34_9 : ACGCATACGCATACGCATACGCATACGCATACGCATACGCATACGCATAC
```

Figure S4 C, page 2

```

                *           *           *           *           400
MAM22_34_3 : -----
MAM22_34_4 : GCATACGCATACGCATACGCATACGCATACG-----
MAM22_34_7 : GCATACGCATACGCATACGCATACGCATACG-----
MAM22_34_8 : GCATACGCATACGCATACGCATACGCATACGCATACGCATACGCATACGC
MAM22_34_9 : GCATACGCATACGCATACGCATACGCATACGCATACGCATACGCATACGC

                *           *           *           *           450

MAM22_34_3 : -----
MAM22_34_4 : -----
MAM22_34_7 : -----
MAM22_34_8 : ATACGCATACGCATACGCATACGCATACGCATACGCATACGCATACGCAT
MAM22_34_9 : ATACGCATACGCATACGCATACGCATACGCATACGCATACGCATACGCAT

                *           *           *           *           500
MAM22_34_3 : -----TAACCACTATG
MAM22_34_4 : -----TATACGTATACGTAACCACTATG
MAM22_34_7 : -----
MAM22_34_8 : ACGCATACGCATACGCATACGCATACGTATACGTATACGTAACCACTATG
MAM22_34_9 : ACGCATACGCATACGCATACGCATACGTATACGTATACGTAAN-ACTATG

                *           *           530
MAM22_34_3 : TAACTATCTCTTCAAACCCCTTACCC
MAM22_34_4 : TAACTATCTCTTCAAACCCCTTACCC
MAM22_34_7 : -----
MAM22_34_8 : TAACTATCTCTTCAAACCCCTTACTC
MAM22_34_9 : TAACTATCTCTTCAAACCCCTTACCC
```
