# Supplementary material
Source: PubMed Central journal article supplement (PMC1397898)
Supplement: pbio.0040073.sg006.pdf [file pbio.0040073.sg006.pdf]

Figure S6 A, page 1

```

                *           20           *           40           *
fragm 11 : CGCCTTGAAGGAGGGGGAAAAAGGCGGGGAGAAGCCCCGGCAGAATTGAAGCTGCTT : 56
MAM 11 1 : ..... : 56
MAM 11 4 : T..... : 56
MAM 11 2 : ..T..... : 56
MAM 11 6 : ..TT..... : 56
MAM 11 3 : .....T..... : 56
MAM_11_5 : .....A..... : 56

                60           *           80           *           100           *
fragm 11 : TTTTCGAATTTGCAGTTTCGACATGTTTACACTTTCAAGGCCTGGTAAAAAGAGATT : 112
MAM 11 1 : ..... : 112
MAM 11 4 : ..... : 112
MAM 11 2 : ..... : 112
MAM 11 6 : ..... : 112
MAM 11 3 : ..... : 112
MAM_11_5 : ..... : 112

                120           *           140           *           160
fragm 11 : ACTCTCTGTGGTTAGATTTACAGTCTAATACTTACTCAGCCATTTTACCTATGTTT : 168
MAM 11 1 : ..... : 168
MAM 11 4 : ..... : 168
MAM 11 2 : ..... : 168
MAM 11 6 : ..... : 168
MAM 11 3 : ..... : 168
MAM_11_5 : ..... : 168

                *           180           *           200           *           220
fragm 11 : GCTAACCGCTGACTATATTCAACAAACCACAAAGACATTGGGACACTGTATCTATT : 224
MAM 11 1 : ..... : 224
MAM 11 4 : ..... : 224
MAM 11 2 : ..... : 224
MAM 11 6 : ..... : 224
MAM 11 3 : ..... : 224
MAM_11_5 : ..... : 224

                *           240           *           260           *           280
fragm 11 : ATTTGGTGCTTGAGCTGGTATAGTAGGGACTGCTTTTAGTATCCTAATTCGGGCAG : 280
MAM 11 1 : ..... : 280
MAM 11 4 : ..... : 280
MAM 11 2 : ..... : 280
MAM 11 6 : ..... : 280
MAM 11 3 : ..... : 280
MAM_11_5 : ..... : 280

                *           300           *           320           *
fragm 11 : AACTAGGTCAACCAGGCTCTCTTCTTGGAGACGACCAAATCTATAATGTTATTGTC : 336
MAM 11 1 : ..... : 336
MAM 11 4 : ..... : 336
MAM 11 2 : ..... : 336
MAM 11 6 : ..... : 336
MAM 11 3 : ..... : 336
MAM_11_5 : ..... : 336
```

Figure S6 A, page 2

```
          340          *          360          *          380          *
fragm 11 : ACAGCACACGCCTTTGTAATAATCTTCTTTATAGTTATGCCAATTATAATTGGAGG : 392
MAM_11_1 : ..... : 392
MAM_11_4 : .T..... : 392
MAM_11_2 : ..... : 392
MAM_11_6 : .....A. : 392
MAM_11_3 : ..... : 392
MAM_11_5 : ..... : 392
```

```
          400          *          420          *          440
fragm 11 : CTTTGGAAACTGATTAATTCCACTTATAATCGGAGCACCTGATATAGCTTTTCCTC : 448
MAM_11_1 : ..... : 448
MAM_11_4 : ..... : 448
MAM_11_2 : ..... : 448
MAM_11_6 : ..... : 448
MAM_11_3 : ..... : 448
MAM_11_5 : ..... : 448
```

```
          *          460          *          480          *          500
fragm 11 : GAATAACAATATGAGTTTTTGACTACTACCTCCATCTTTCCTACTACTCTTGGCA : 504
MAM_11_1 : ..... : 504
MAM_11_4 : ..... : 504
MAM_11_2 : .....C..... : 504
MAM_11_6 : ..... : 504
MAM_11_3 : ..... : 504
MAM_11_5 : ..... : 504
```

```
          *          520          *          540          *          560
fragm 11 : TCTTCCATAGTAGAAGCTGGGACAGGCACTGGTTGGACCGTATACCCTCCCCTGGC : 560
MAM_11_1 : .....A.....T..... : 560
MAM_11_4 : ..... : 560
MAM_11_2 : ..... : 560
MAM_11_6 : ..... : 560
MAM_11_3 : ..... : 560
MAM_11_5 : ..... : 560
```

```
          *
fragm 11 : AGGAAACCTAGCCCATGCA : 579
MAM_11_1 : ..... : 579
MAM_11_4 : ..... : 579
MAM_11_2 : ..... : 579
MAM_11_6 : ..... : 579
MAM_11_3 : ..... : 579
MAM_11_5 : ..... : 579
```

**Figure S6 B**

```

          *           20           *           40           *
fragm17   : TCTATTACCCTATTCATTTCGCTCCTACAGCACAACTAACCGTAAACTTAAGCAT : 54
MAM22_17_2 : ..... : 54
MAM22_17_3 : ..... : 54
MAM22_17_5 : ..... : 54

          60           *           80           *           100
fragm17   : AGCAATCCCCCTATGGACTGGTACAGtTATCCTGGGCTTCCGATATAAAAATAA : 108
MAM22_17_2 : ..... : 108
MAM22_17_3 : ..... : 108
MAM22_17_5 : .....C..... : 108

          *           120           *           140           *           160
fragm17   : AATCTCACTAGCCCAtCTTCTCCCACAAGGAACACCTACATTCCCTTATCCCTAT : 162
MAM22_17_2 : ..... : 162
MAM22_17_3 : ..... : 162
MAM22_17_5 : .....C..... : 162

          *           180           *           200           *
fragm17   : AATTATTATTATCGAAACCATTAGTCTCCTCATTTCGACCAGTCACTCTAGCGGT : 216
MAM22_17_2 : ..... : 216
MAM22_17_3 : ..... : 216
MAM22_17_5 : ..... : 216

          220           *           240           *           260           *
fragm17   : TCGACTCACCGCTAATATCACGGCAGGTCACTTACTTATTCATTTAACCGGAAC : 270
MAM22_17_2 : ..... : 270
MAM22_17_3 : ..... : 270
MAM22_17_5 : ..... : 270

          280           *           300           *           320
fragm17   : CGCCGCACTAACTTTACTAtCAATTCATTCAATAACAATTACAGTAACATTTAT : 324
MAM22_17_2 : ..... : 324
MAM22_17_3 : .....C..... : 324
MAM22_17_5 : ..... : 324

          *           340           *           360           *           3
fragm17   : TACTGTAgTTGTACTTACGATCCTGGAACCTTGCCcGTAGCACTAATTCAGGCCTA : 378
MAM22_17_2 : ..... : 378
MAM22_17_3 : .....A..... : 378
MAM22_17_5 : .....T..... : 378

          80           *           400           *           420           *
fragm17   : CGTCTTTGCCCTACTAATTAGCCTCTACCTACATGAGAGTGCTTAATGACTCAC : 432
MAM22_17_2 : ..... : 432
MAM22_17_3 : ..... : 432
MAM22_17_5 : ..... : 432

          440           *           460           *           480
fragm17   : CAAACACATGCCTATCACATAGTAGATCCAAGTCCCTGACCTCTTACCGGAGCA : 486
MAM22_17_2 : ..... : 486
MAM22_17_3 : ..... : 486
MAM22_17_5 : ..... : 486

          *           500           *
fragm17   : TTATCTGCCCTACTTATAACATCT : 510
MAM22_17_2 : ..... : 510
MAM22_17_3 : ..... : 510
MAM22_17_5 : ..... : 510

```
