# Supplementary material
Source: PubMed Central journal article supplement (PMC1397898)

Figure S1

A

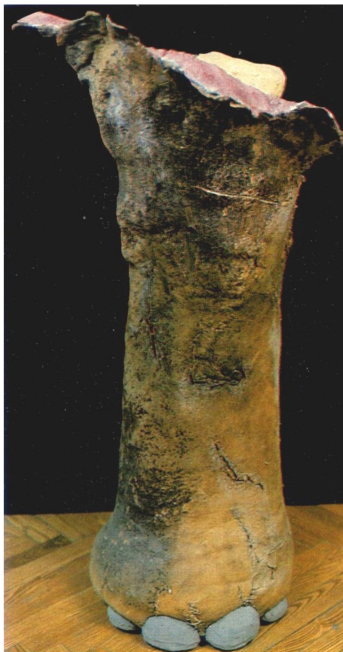

B

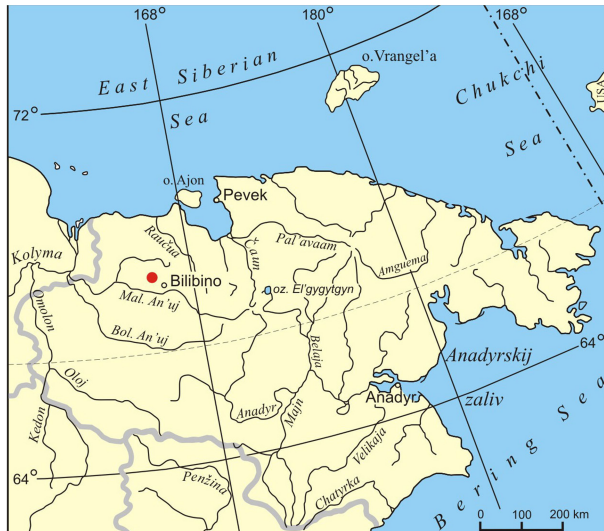

Supplement: pbio.0040073.sg001.pdf [file pbio.0040073.sg001.pdf]

Figure S2

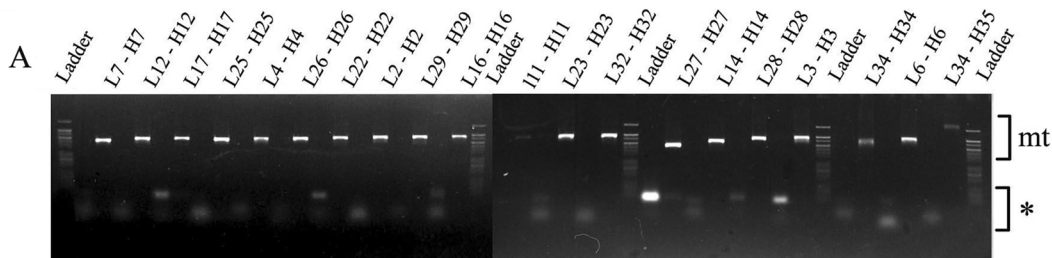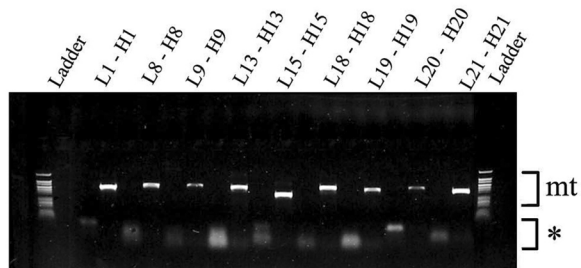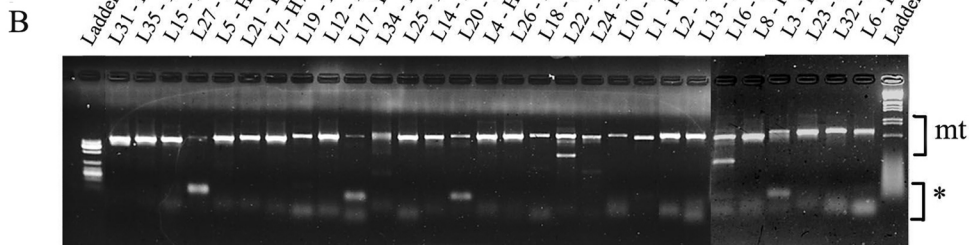

Supplement: pbio.0040073.sg002.pdf [file pbio.0040073.sg002.pdf]

Figure S3

A

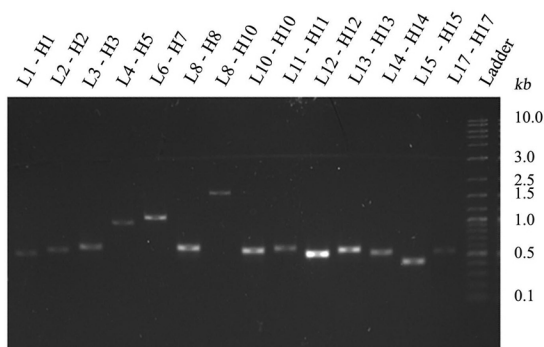

B

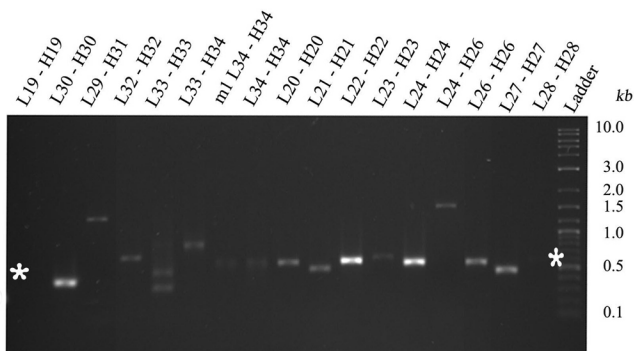

C

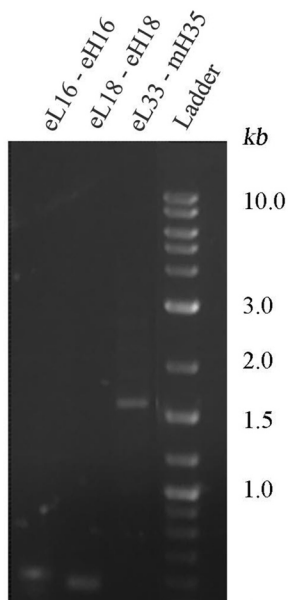

D

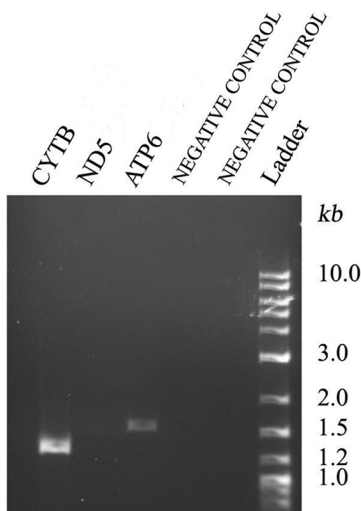

Supplement: pbio.0040073.sg003.pdf [file pbio.0040073.sg003.pdf]

Figure S5 B

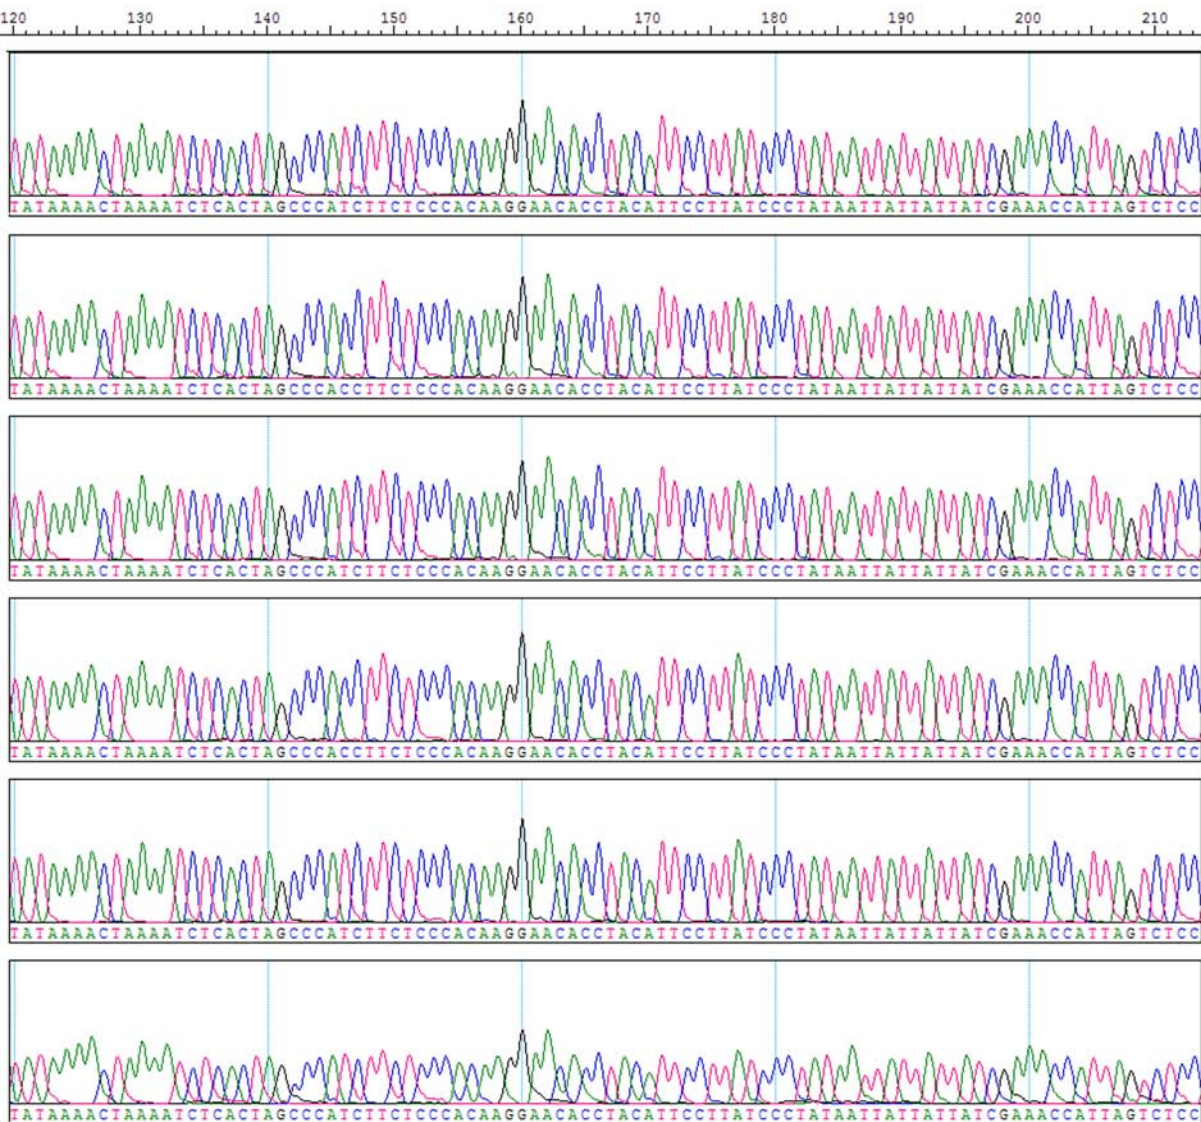

Figure S5 C

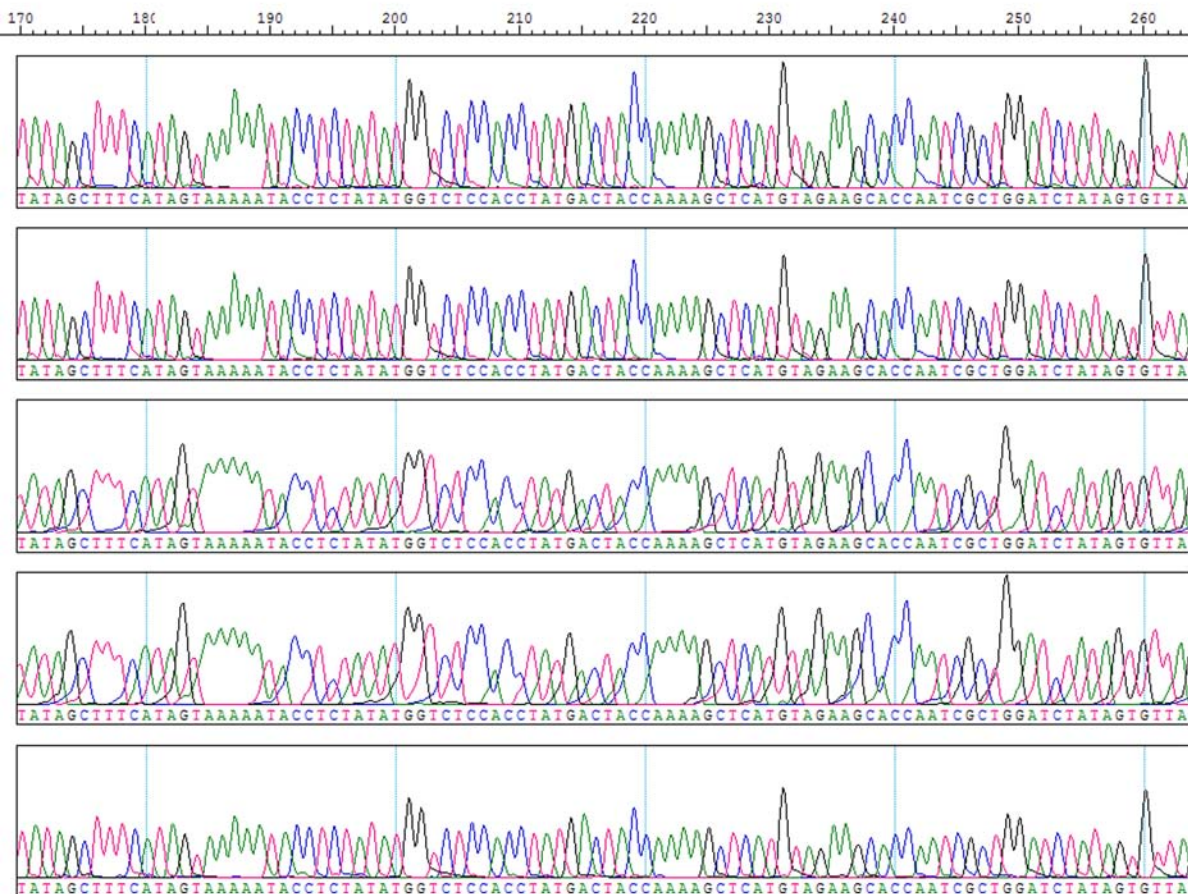

Supplement: pbio.0040073.sg005.pdf [file pbio.0040073.sg005.pdf]
